# Supplementary material for: Reframing climate change as a public health issue: an exploratory study of public reactions
Source: Springer Nature journal article supplement (doi:10.1186/1471-2458-10-299), 2010-06-01
Supplement: 12889_2010_2210_MOESM1_ESM.pdf [file 12889_2010_2210_MOESM1_ESM.pdf]

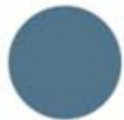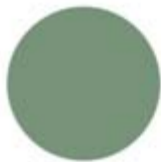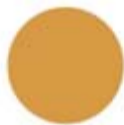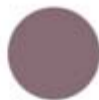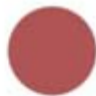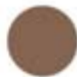

**Alarmed**  
18%

**Concerned**  
33%

**Cautious**  
19%

**Disengaged**  
12%

**Doubtful**  
11%

**Dismissive**  
7%

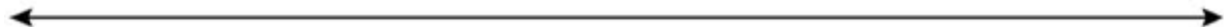

Highest Belief in Global Warming  
Most Concerned  
Most Motivated

Lowest Belief in Global Warming  
Least Concerned  
Least Motivated

n=2,129
