# Supplementary figures and images for: Reframing climate change as a public health issue: an exploratory study of public reactions
Source: Springer Nature journal article supplement (doi:10.1186/1471-2458-10-299), 2010-06-01

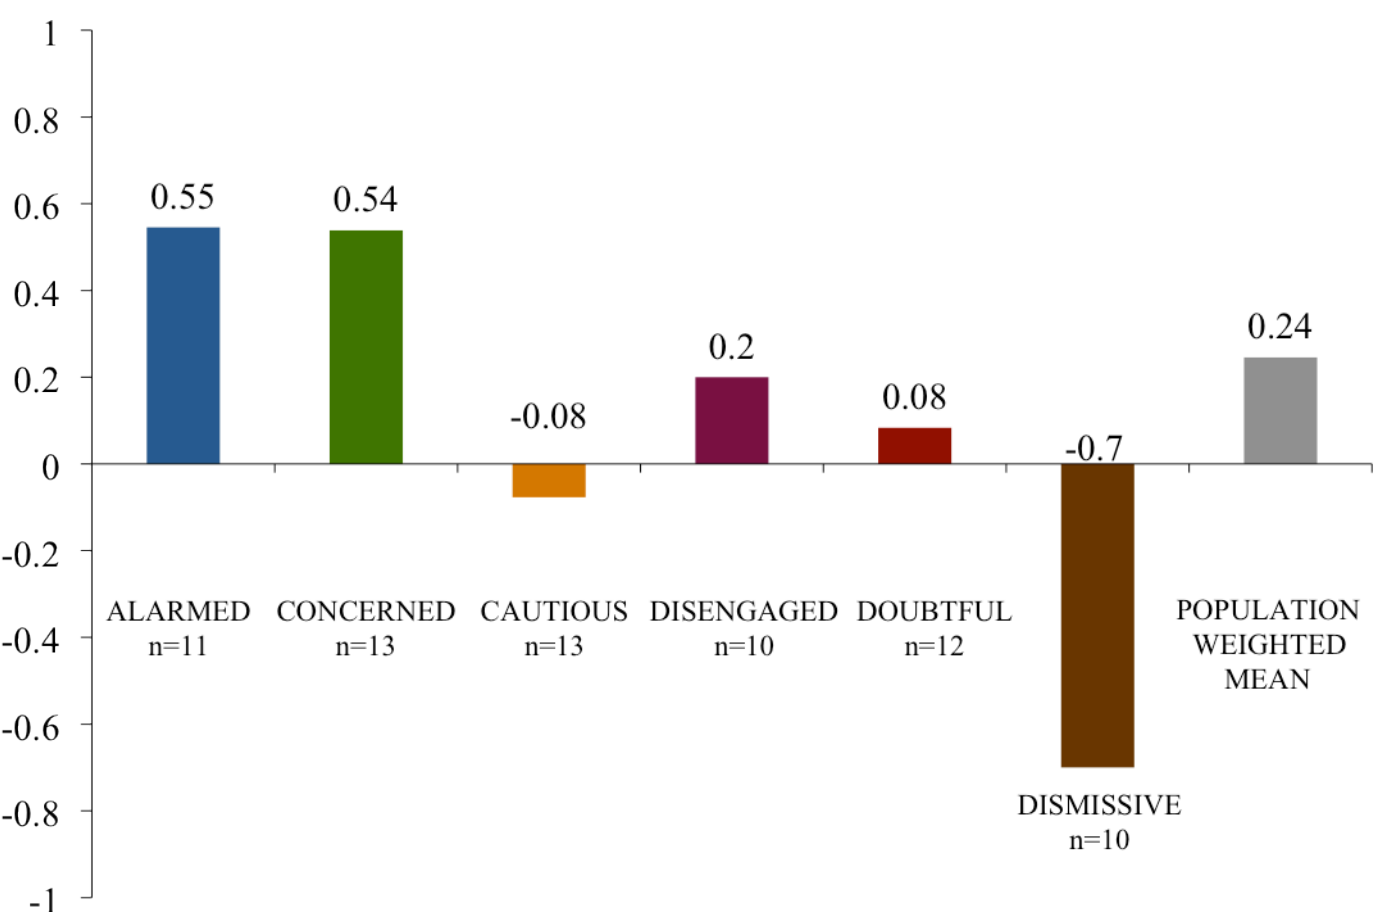

Supplement: 12889_2010_2210_MOESM2_ESM.pdf [file 12889_2010_2210_MOESM2_ESM.pdf]

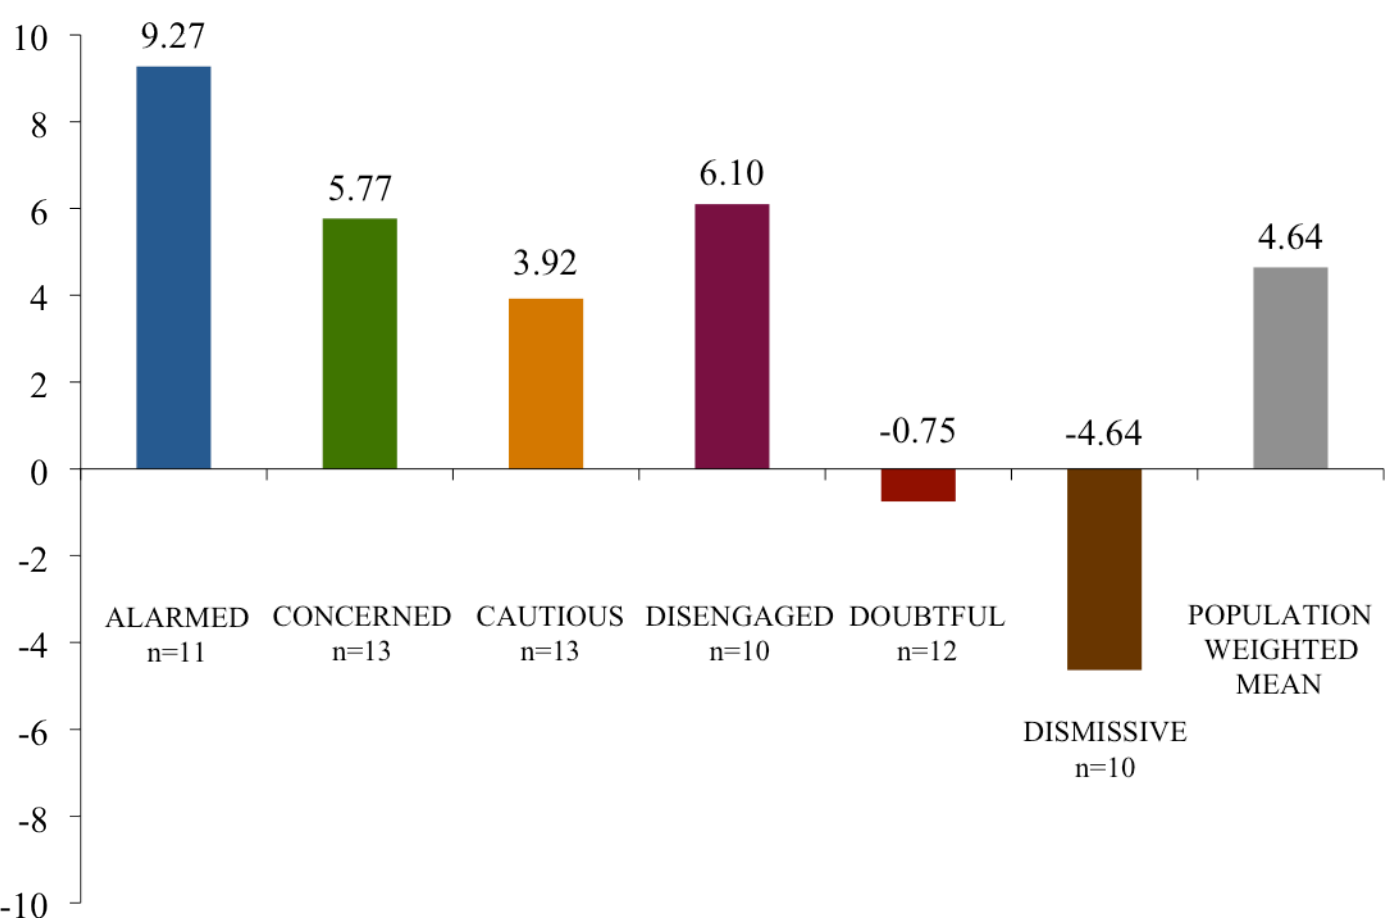

Supplement: 12889_2010_2210_MOESM3_ESM.pdf [file 12889_2010_2210_MOESM3_ESM.pdf]

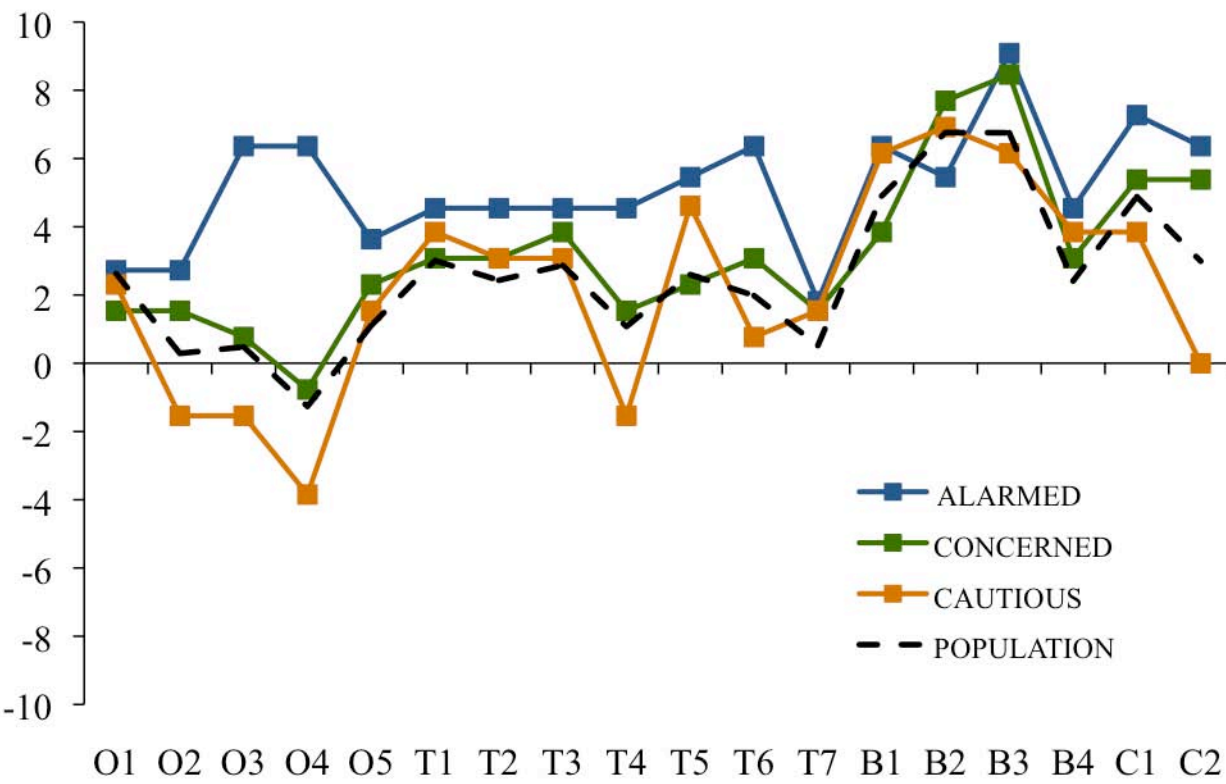

Supplement: 12889_2010_2210_MOESM4_ESM.pdf [file 12889_2010_2210_MOESM4_ESM.pdf]

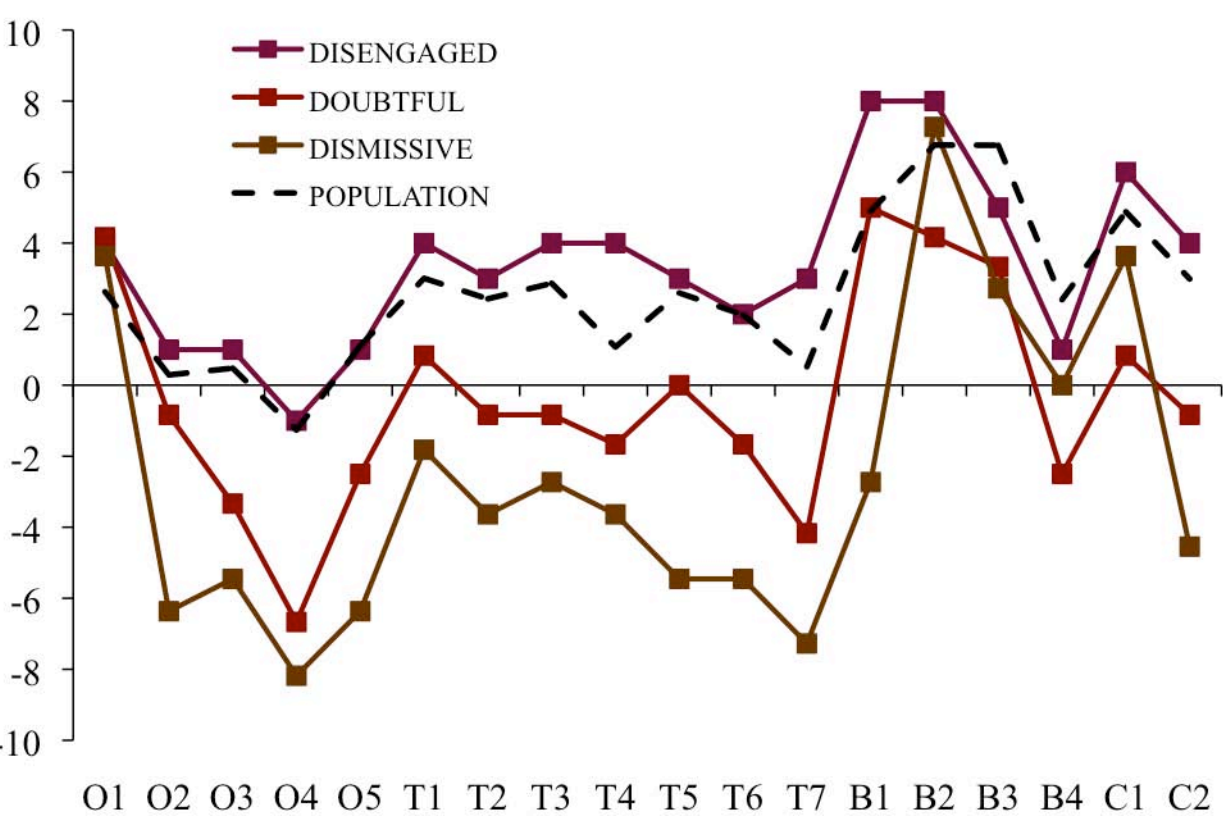

Supplement: 12889_2010_2210_MOESM5_ESM.pdf [file 12889_2010_2210_MOESM5_ESM.pdf]

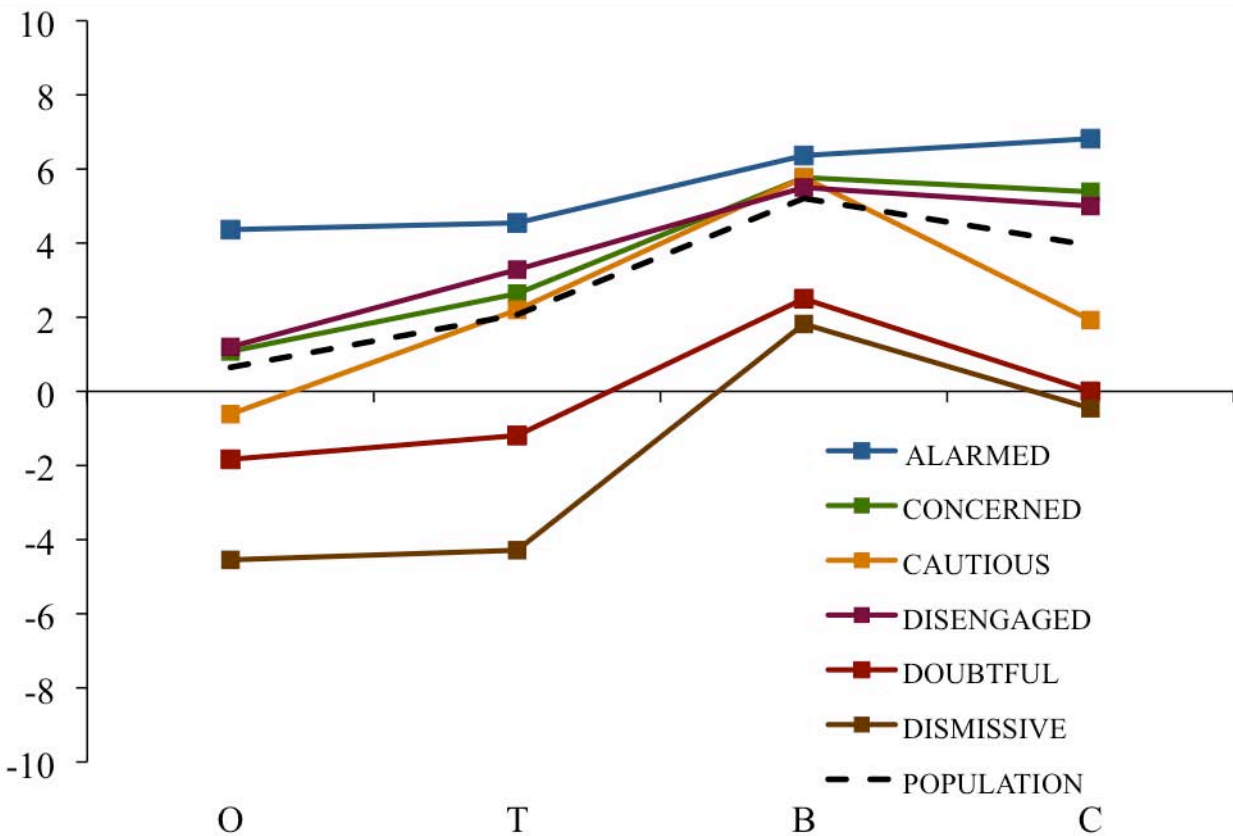

Supplement: 12889_2010_2210_MOESM6_ESM.pdf [file 12889_2010_2210_MOESM6_ESM.pdf]
